# Supplementary material for: Associated Factors of Hypertension in Women and Men in Vietnam: A Cross-Sectional Study
Source: PubMed Central journal article supplement (PMC6926662; doi:10.3390/ijerph16234714), 2019-11-26
Supplement: ijerph-16-04714-s001.pdf [file ijerph-16-04714-s001.pdf]

**Table S1.** The Spearman correlation among the covariates.

|                         | Age          | Gender      | Marital status | Education | Occupation | Income | Diabetes    | High TC | Smoking     | Drinking | Added salts | BMI  |
|-------------------------|--------------|-------------|----------------|-----------|------------|--------|-------------|---------|-------------|----------|-------------|------|
| <b>Overall (N=2203)</b> |              |             |                |           |            |        |             |         |             |          |             |      |
| Gender                  | -.129        |             |                |           |            |        |             |         |             |          |             |      |
| Marital status          | <b>.335</b>  | -.102       |                |           |            |        |             |         |             |          |             |      |
| Education               | -.281        | .149        | -.206          |           |            |        |             |         |             |          |             |      |
| Occupation              | <b>-.311</b> | .082        | -.142          | -.022     |            |        |             |         |             |          |             |      |
| Income                  | -.168        | .070        | .052           | .185      | -.042      |        |             |         |             |          |             |      |
| Diabetes                | .208         | -.011       | .052           | -.048     | -.114      | .004   |             |         |             |          |             |      |
| High TC                 | .208         | .003        | .117           | -.027     | -.151      | .006   | <b>.347</b> |         |             |          |             |      |
| Smoking                 | -.002        | <b>.505</b> | .059           | -.017     | .065       | .026   | -.010       | .007    |             |          |             |      |
| Drinking                | -.109        | <b>.531</b> | -.055          | .126      | .096       | .090   | -.054       | .002    | <b>.431</b> |          |             |      |
| Added salts             | -.028        | -.033       | .001           | -.013     | .042       | -.030  | -.003       | .007    | -.015       | .015     |             |      |
| BMI                     | .066         | .056        | .062           | -.054     | -.041      | -.037  | .079        | .182    | .008        | .011     | -.011       |      |
| Abdominal obesity       | .174         | -.079       | .155           | -.058     | -.036      | -.004  | .136        | .177    | -.014       | -.040    | -.112       | .181 |
| <b>Women (N=1285)</b>   |              |             |                |           |            |        |             |         |             |          |             |      |
| Marital status          | .285         |             |                |           |            |        |             |         |             |          |             |      |
| Education               | <b>-.313</b> |             | -.233          |           |            |        |             |         |             |          |             |      |
| Occupation              | <b>-.350</b> |             | -.125          | .058      |            |        |             |         |             |          |             |      |
| Income                  | -.169        |             | .021           | .211      | -.025      |        |             |         |             |          |             |      |
| Diabetes                | .219         |             | .044           | -.099     | -.131      | -.003  |             |         |             |          |             |      |
| High TC                 | .236         |             | .092           | -.061     | -.164      | -.025  | <b>.352</b> |         |             |          |             |      |
| Added salts             | -.007        |             | .012           | -.002     | .045       | -.035  | .048        | .029    |             |          |             |      |
| BMI                     | .130         |             | .091           | -.092     | -.075      | -.071  | .087        | .163    |             |          | -.010       |      |
| Abdominal obesity       | .148         |             | .133           | -.030     | .009       | -.005  | .143        | .166    |             |          | -.110       | .169 |
| <b>Men (N=918)</b>      |              |             |                |           |            |        |             |         |             |          |             |      |
| Marital status          | <b>.380</b>  |             |                |           |            |        |             |         |             |          |             |      |
| Education               | -.201        |             | -.147          |           |            |        |             |         |             |          |             |      |
| Occupation              | -.235        |             | -.147          | -.174     |            |        |             |         |             |          |             |      |
| Income                  | -.147        |             | .110           | .118      | -.085      |        |             |         |             |          |             |      |
| Diabetes                | .197         |             | .061           | .037      | -.085      | .015   |             |         |             |          |             |      |
| High TC                 | .175         |             | .150           | .026      | -.138      | .052   | <b>.340</b> |         |             |          |             |      |
| Smoking                 | .106         |             | .185           | -.178     | .055       | -.013  | -.024       | .001    |             |          |             |      |
| BMI                     | -.002        |             | .045           | -.025     | -.010      | .002   | .070        | .207    | -.038       |          |             |      |
| Abdominal obesity       | .187         |             | .168           | -.075     | -.089      | .011   | .123        | .194    | .045        |          |             | .209 |

Abbreviations: TC, total cholesterol; CVD, cardiovascular disease; BMI, body mass index.
